# Supplementary material for: Association of DNA-Methylation Profiles With Immune Responses Elicited in Breast Cancer Patients Immunized With a Carbohydrate-Mimicking Peptide: A Pilot Study
Source: Front Oncol. 2020 Jun 5;10:879. doi: 10.3389/fonc.2020.00879 (PMC7290046; doi:10.3389/fonc.2020.00879)
Supplement: Supplementary file 2 [file Table_2.XLSX]

## Sheet: Hoja1
Table S2. 182 differentially methylated CpGs from the association of the DNA methylation profiles with IgG titers elicited after the third vaccination with P10s-PADRE.
Probeset ID	UCSC_CpG_Islands_Name	UCSC_RefGene_Accession	UCSC_RefGene_Group	UCSC_RefGene_Name	p-value(Ab levels log)	F(Ab levels log)	SS(Ab levels log)	PartialCorr(Ab levels log)	SS(Error)	F(Error)
cg03768017	chr4:185746557-185747827	NM_001995	TSS200	ACSL1	1.45683e-05	161.471	0.105745	-0.981923	0.00392932	1
cg01317029		NM_001171093;NM_144635	3'UTR;3'UTR	FAM131A;FAM131A	1.59939e-05	156.363	0.405835	0.981349	0.0155728	1
cg20279653		NM_020448	3'UTR	NIPAL3	2.07467e-05	142.939	0.0982749	0.979651	0.00412517	1
cg05208381	chr2:45870696-45871051				2.35294e-05	136.852	0.824216	-0.978774	0.0361362	1
cg14083372	chr9:136324676-136325527	NM_017586;NM_001135775	TSS1500;TSS1500	C9orf7;C9orf7	2.35546e-05	136.801	0.0729694	0.978766	0.00320039	1
cg00129563	chr5:122433878-122435551	NM_001136239	Body	PRDM6	2.96595e-05	126.299	0.219837	0.977061	0.0104437	1
cg04501624	chr8:1649439-1649759	NM_004745	3'UTR	DLGAP2	2.97583e-05	126.153	0.350435	0.977035	0.0166671	1
cg05800336					3.26764e-05	122.12	0.695816	0.976304	0.0341869	1
cg05404418	chr2:157256808-157257111				3.57736e-05	118.333	0.13757	0.975573	0.00697539	1
cg20049294	chr12:120875654-120876366	NM_004373	TSS1500	COX6A1	4.446e-05	109.697	0.319407	0.973725	0.0174703	1
cg21594558	chr9:37464814-37466569	NM_014872	TSS200	ZBTB5	5.04931e-05	104.925	0.0861388	0.972579	0.00492576	1
cg05337681		NM_000236	Body	LIPC	5.94968e-05	99.0621	0.497108	0.971026	0.0301089	1
cg07437464		NR_026999	Body	LOC349114	7.08446e-05	93.1673	0.0730879	0.969276	0.00470688	1
cg19091403	chr14:78108170-78108662				7.1842e-05	92.7099	1.05003	0.969131	0.067956	1
cg11718886	chr1:219347109-219347572				7.22113e-05	92.5427	0.301308	0.969078	0.0195353	1
cg25599012		NM_004877	TSS1500	GMFG	7.75509e-05	90.2454	0.216179	0.968328	0.0143728	1
cg27542828	chr7:100171148-100172286	NM_001168682	TSS1500	SAP25	7.99319e-05	89.288	0.536492	0.968005	0.0360514	1
cg01726265	chr17:4802265-4805402	NM_000080;NM_001145536	Body;3'UTR	CHRNE;C17orf107	8.65929e-05	86.7999	6.38976	-0.967132	0.441689	1
cg26550235		NM_001136265	Body	IFFO2	0.000102628	81.7339	0.729078	0.9652	0.0535208	1
cg03847895	chr12:56651692-56652527	NM_173595	TSS1500	ANKRD52	0.000113752	78.8019	0.35425	0.963975	0.0269727	1
cg08375300		NR_120514	TSS200	LOC102723427	0.000114623	78.5887	0.502975	0.963882	0.0384005	1
cg19051578	chr5:59995374-59996331	NM_018369;NM_001145208	TSS1500;TSS1500	DEPDC1B;DEPDC1B	0.000119899	77.3411	0.0836915	-0.963331	0.00649266	1
cg19225512	chr10:72647738-72648317	NM_000281	TSS200	PCBD1	0.000123386	76.556	0.651959	0.962976	0.0510966	1
cg24364640	chr4:154265607-154266394	NM_001253861;NM_032117;NR_045605	TSS1500;TSS1500;TSS1500	MND1;MND1;MND1	0.000124363	76.3412	0.81114	0.962877	0.0637511	1
cg11471298	chr2:233765849-233766119	NM_001114090;NM_019850	Body;Body	NGEF;NGEF	0.000134465	74.2456	0.0937961	0.961889	0.00757993	1
cg17280624	chr4:129208297-129209780	NM_006320	1stExon	PGRMC2	0.00014987	71.4243	0.14088	0.960471	0.0118346	1
cg12625126					0.000151482	71.1515	0.446529	-0.960329	0.0376545	1
cg05511027		NM_032445	Body	MEGF11	0.000154368	70.6727	0.230738	0.960076	0.0195893	1
cg11977361		NR_122119;NM_001193531;NM_001193453;NM_001294314;NM_138341	Body;Body;Body;5'UTR;5'UTR	TMEM116;TMEM116;TMEM116;TMEM116;TMEM116	0.000159077	69.9164	0.119411	0.95967	0.0102475	1
cg26803670		NM_203444;NM_019625;NM_019624	Body;Body;Body	ABCB9;ABCB9;ABCB9	0.00016788	68.5797	0.0463628	0.958931	0.00405625	1
cg23142831					0.000172897	67.8591	0.0917511	0.958522	0.00811249	1
cg17046247		NM_178039;NR_027948;NR_027949;NM_178040;NR_027946	Body;Body;Body;Body;Body	ERC1;ERC1;ERC1;ERC1;ERC1	0.000180198	66.8587	0.420061	0.95794	0.0376969	1
cg00117018	chr8:145955639-145955989	NM_138367	Body	ZNF251	0.000183479	66.4266	5.30429	0.957683	0.479112	1
cg11033338		NM_001256821;NM_001256820;NM_006912	TSS1500;TSS200;TSS200	RIT1;RIT1;RIT1	0.000185356	66.1839	0.33815	0.957538	0.0306555	1
cg03239328		NR_024398	Body	ZBED3-AS1	0.000193783	65.1338	0.219845	0.956897	0.0202517	1
cg12486814		NM_001013625	TSS200	C1orf192	0.000200652	64.3218	0.260203	0.956388	0.024272	1
cg10685628					0.000203015	64.0511	0.597679	-0.956216	0.0559878	1
cg06444025	chr17:4802265-4805402	NM_000080;NM_001145536	Body;3'UTR	CHRNE;C17orf107	0.00022122	62.0968	2.12074	-0.954929	0.204913	1
cg25972499	chr1:151762604-151764007	NM_001083965;NM_001083963;NM_006862;NM_001083964	TSS1500;TSS1500;TSS1500;TSS1500	TDRKH;TDRKH;TDRKH;TDRKH	0.000227154	61.5056	0.268525	0.954525	0.0261952	1
cg10390473		NM_001166373	Body	2018-03-01	0.000234109	60.8383	0.675973	0.95406	0.0666659	1
cg27154234		NM_007045;NM_194429;NM_001278690	Body;Body;Body	FGFR1OP;FGFR1OP;FGFR1OP	0.000242052	60.1079	0.377185	0.95354	0.0376508	1
cg15754399		NM_021647;NM_001301647	5'UTR;5'UTR	MFAP3L;MFAP3L	0.000243543	59.9744	0.134193	0.953444	0.0134251	1
cg14937128		NM_206909;NM_015310	TSS1500;Body	PSD3;PSD3	0.000246884	59.6791	2.39751	0.95323	0.241041	1
cg14674856	chr5:179222608-179223825	NM_145867	TSS1500	LTC4S	0.000251816	59.2527	0.0867321	0.952916	0.0087826	1
cg25217710	chr1:156611639-156612447				0.000252384	59.2043	0.187466	0.952881	0.0189986	1
cg15735386		NM_007348	TSS1500	ATF6	0.000253052	59.1476	0.406832	-0.952839	0.0412695	1
cg00593773	chr18:77336081-77336282				0.000254339	59.0389	0.297232	0.952758	0.0302071	1
cg16784174					0.000256368	58.869	0.412594	0.952631	0.0420521	1
cg19442900	chr11:17229114-17229833				0.000257262	58.7947	0.1032	0.952575	0.0105315	1
cg15317793	chr19:12902107-12904954				0.000262118	58.397	0.212917	-0.952275	0.0218761	1
cg26628814	chr16:28936053-28937036	NM_024816	TSS1500	RABEP2	0.000262214	58.3893	0.119827	-0.952269	0.0123132	1
cg26675379		NM_024830	Body	LPCAT1	0.000269914	57.7788	0.2658	0.951801	0.0276018	1
cg19107647					0.000280667	56.9641	1.19996	0.951161	0.126392	1
cg10955576	chr11:2442070-2442402	NM_014555	TSS1500	TRPM5	0.000280683	56.9628	0.186855	0.95116	0.0196818	1
cg26265390		NM_022138;NM_001166412	Body;Body	SMOC2;SMOC2	0.000282329	56.8418	0.434186	0.951064	0.045831	1
cg19412099		NM_001143979;NM_017668	Body;Body	NDE1;NDE1	0.000288611	56.3884	0.141256	0.950699	0.0150303	1
cg08684580	chr7:98030097-98030422	NM_018842	Body	BAIAP2L1	0.000305682	55.22	4.38319	-0.949733	0.476261	1
cg18989017	chr11:129765145-129765617	NM_001143835;NM_006165	5'UTR;TSS1500	NFRKB;NFRKB	0.000309247	54.987	0.34767	-0.949536	0.0379367	1
cg23977256		NM_006778;NM_052828	Body;Body	TRIM10;TRIM10	0.000317537	54.4586	0.183713	-0.949083	0.0202407	1
cg03393996	chr4:1580050-1580455				0.000332732	53.5364	20.3125	-0.948273	2.27649	1
cg01878724		NM_130900	TSS1500	RAET1L	0.000348861	52.617	0.35636	0.947439	0.0406363	1
cg04070995	chr10:100227438-100227832	NM_001166244;NM_001166245;NM_021828;NM_001166246	Body;Body;Body;Body	HPSE2;HPSE2;HPSE2;HPSE2	0.000355796	52.2389	0.516895	0.947088	0.0593689	1
cg12842511		NM_006504;NM_130435	Body;Body	PTPRE;PTPRE	0.000363379	51.8366	0.285339	0.94671	0.0330275	1
cg25809222	chr5:40755537-40756257	NM_012382	TSS1500	TTC33	0.000364854	51.7597	0.511239	0.946637	0.059263	1
cg05045380					0.000366757	51.661	0.122403	0.946543	0.0142161	1
cg06751322		NM_001039569	Body	AP1S3	0.00036918	51.5364	0.107983	-0.946424	0.0125717	1
cg22174399		NM_005862	Body	STAG1	0.000369467	51.5217	0.592411	0.94641	0.0689897	1
cg22076311		NM_032682	Body	FOXP1	0.000373761	51.3037	0.130753	-0.9462	0.0152917	1
cg02374934	chr15:41228442-41228872	NM_019074	Body	DLL4	0.000386941	50.6548	0.276222	0.945566	0.0327182	1
cg05906457					0.000394037	50.3175	0.104702	0.945231	0.012485	1
cg02642841		NM_004557	Body	NOTCH4	0.000402604	49.921	0.270934	0.944831	0.0325635	1
cg00827748					0.000421132	49.1007	0.239849	-0.943985	0.0293091	1
cg24164996					0.000429095	48.7627	0.174759	0.943629	0.0215032	1
cg00639195	chr15:79102715-79104628	NM_014272	Body	ADAMTS7	0.00042915	48.7604	0.281646	-0.943627	0.0346567	1
cg23965022	chr3:183892455-183893184	NM_004068;NM_001025205	TSS200;TSS200	AP2M1;AP2M1	0.000429489	48.7462	0.435762	0.943612	0.0536364	1
cg04763709					0.000432509	48.6204	0.668665	-0.943478	0.0825166	1
cg27031015		NM_206821;NM_206820;NM_206819;NM_001254721;NM_001254720;NM_001254719;NM_002465;NM_00125	Body;Body;Body;Body;Body;Body;Body;Body;Body;Body	MYBPC1;MYBPC1;MYBPC1;MYBPC1;MYBPC1;MYBPC1;MYBPC1;MYBPC1;MYBPC1;MYBPC1	0.000438927	48.3569	0.159794	-0.943196	0.0198268	1
cg24530522					0.00044766	48.0064	0.840681	0.942816	0.105071	1
cg03471318	chr19:50528176-50529486	NM_001025778;NM_016440;NM_001308420;NM_001025778;NM_016440;NM_015428;NM_001006656;NM_00	1stExon;1stExon;TSS200;5'UTR;5'UTR;TSS1500;TSS1500;TSS1500	VRK3;VRK3;VRK3;VRK3;VRK3;ZNF473;ZNF473;ZNF473	0.000454166	47.7512	1.4759	-0.942536	0.185449	1
cg08459984	chr1:205718238-205719345	NM_022731	TSS200	NUCKS1	0.000467578	47.2401	0.0581711	-0.941968	0.00738835	1
cg20995450	chr7:100291183-100292266				0.000469103	47.1833	0.198428	0.941904	0.0252328	1
cg10851683	chr12:94541727-94544000	NM_005761	1stExon	PLXNC1	0.000475216	46.9577	0.223148	0.941649	0.0285126	1
cg19725343	chr19:51830064-51831145	NM_001101372	Body	IGLON5	0.00048547	46.588	0.121034	-0.941226	0.0155878	1
cg11797225		NM_001291656;NM_025139;NM_001271466	5'UTR;5'UTR;TSS200	ARMC9;ARMC9;ARMC9	0.000492041	46.3565	0.589532	0.940958	0.0763041	1
cg16301857	chr17:17183886-17184699	NM_003653	TSS200	COPS3	0.000492887	46.327	0.0774274	0.940923	0.0100279	1
cg07590196	chr16:30661983-30663253	NM_024031	TSS1500	PRR14	0.00050476	45.9199	0.724918	-0.940445	0.0947195	1
cg27028760	chr16:2041825-2043026	NM_004209	Body	SYNGR3	0.000508383	45.7982	0.262298	-0.940301	0.0343635	1
cg17158101		NR_024199;NM_024814	Body;3'UTR	CBLL1;CBLL1	0.000513961	45.6131	0.362399	-0.94008	0.0476704	1
cg22889620	chr14:75642864-75643376	NM_006827	Body	TMED10	0.000517726	45.4897	0.386463	0.939932	0.0509737	1
cg00815693		NM_001242690;NM_024534	5'UTR;5'UTR	ERVMER34-1;ERVMER34-1	0.000529886	45.0991	0.329599	0.939458	0.04385	1
cg14585799	chr11:75062224-75062977	NM_004041;NM_020251	Body;Body	ARRB1;ARRB1	0.000535459	44.924	0.079378	0.939243	0.0106016	1
cg16504801		NR_130154;NM_005687	Body;Body	FARSB;FARSB	0.000535705	44.9164	0.234424	-0.939234	0.0313148	1
cg04205485	chr20:32399262-32399550	NM_176812	TSS200	CHMP4B	0.000537121	44.8723	0.181978	0.939179	0.0243327	1
cg13559306					0.000538979	44.8147	0.21805	0.939108	0.0291935	1
cg12456794					0.000540908	44.7552	0.0573636	0.939034	0.00769032	1
cg17186025	chr13:44359858-44361696	NM_017993	5'UTR	ENOX1	0.000541205	44.7461	0.104715	0.939023	0.0140413	1
cg16828648	chr11:3829696-3830004	NM_001145438;NM_001145439;NR_027015;NR_027016;NR_027017;NR_027018;NM_014489;NR_027014	Body;Body;Body;TSS1500;Body;Body;TSS1500;Body	PGAP2;PGAP2;PGAP2;PGAP2;PGAP2;PGAP2;PGAP2;PGAP2	0.000542047	44.7202	0.16929	-0.938991	0.0227132	1
cg21682131	chr16:84029456-84029710	NM_019065	Body	NECAB2	0.000550705	44.4573	0.185458	0.938663	0.0250296	1
cg20677824		NM_001962	Body	EFNA5	0.000558078	44.2377	0.382701	-0.938386	0.051906	1
cg15037004		NM_152625	TSS1500	ZNF366	0.000569424	43.9073	0.279854	0.937964	0.0382425	1
cg07271761	chr22:39151457-39152476	NM_015374;NM_001199579;NM_001199580	5'UTR;5'UTR;TSS200	SUN2;SUN2;SUN2	0.000570784	43.8683	0.154963	-0.937914	0.0211948	1
cg13422881	chr2:128051347-128051857	NM_000122	TSS200	ERCC3	0.000574411	43.7648	0.285364	0.937781	0.0391224	1
cg25897951	chr4:1241412-1244111	NM_001328;NM_001012614;NM_052861	TSS1500;TSS1500;TSS200	CTBP1;CTBP1;C4orf42	0.000579913	43.6095	1.63235	0.93758	0.224586	1
cg14747322	chr5:173314931-173315979	NM_030627;NM_030627	5'UTR;1stExon	CPEB4;CPEB4	0.0005811	43.5763	0.0787531	0.937536	0.0108435	1
cg04706738	chr9:22446681-22447695	NM_022160	TSS1500	DMRTA1	0.00058443	43.4835	0.292697	-0.937415	0.0403873	1
cg15743657		NM_152232	TSS1500	TAS1R2	0.000587517	43.3981	0.0829021	0.937304	0.0114616	1
cg13869341		NR_024540	Body	WASH5P	0.000590824	43.3073	0.892023	0.937184	0.123585	1
cg24209690	chr17:48556004-48556509	NR_130911;NM_018346	Body;Body	RSAD1;RSAD1	0.000594042	43.2196	0.079009	0.937068	0.0109685	1
cg18886563	chr5:114961329-114961969	NM_001164468;NM_181836;NM_001164469	Body;Body;Body	TMED7-TICAM2;TMED7;TMED7-TICAM2	0.000599016	43.0853	0.0764243	0.93689	0.0106428	1
cg10153884	chr17:73452534-73452898	NM_014738	TSS1500	KIAA0195	0.000603159	42.9745	0.204805	0.936743	0.0285944	1
cg04850017	chr11:63683743-63684628	NM_173587	Body	RCOR2	0.000625445	42.3957	4.16733	-0.93596	0.589777	1
cg01359822	chr21:40177002-40178667	NM_005239	TSS1500	ETS2	0.000630093	42.2784	3.07667	0.9358	0.436631	1
cg02147981	chr6:131456364-131457157				0.000630854	42.2593	0.271777	0.935773	0.0385871	1
cg14793491	chr18:9102416-9102973	NM_021074	TSS1500	NDUFV2	0.000645067	41.9083	0.10555	-0.935286	0.0151116	1
cg13015157					0.000646975	41.862	0.219261	-0.935222	0.0314263	1
cg10163222	chr19:45004129-45004846	NM_013256	TSS200	ZNF180	0.000647141	41.858	0.225594	-0.935216	0.0323371	1
cg16079130					0.000650757	41.7707	0.403006	0.935094	0.0578883	1
cg22160964					0.000652506	41.7287	0.153042	0.935034	0.0220053	1
cg09854642		NM_001025778;NM_016440;NM_001308420	Body;Body;Body	VRK3;VRK3;VRK3	0.000652931	41.7185	1.15108	0.93502	0.16555	1
cg04647216					0.000665047	41.432	0.191932	0.934614	0.0277947	1
ch.7.84013222F					0.000670573	41.3036	1.34171	-0.93443	0.194905	1
cg11077179		NM_001037763	Body	COL28A1	0.000674953	41.2028	0.713283	0.934285	0.103869	1
cg01618199		NM_001306215;NM_178835	Body;Body	ZNF827;ZNF827	0.000687641	40.9158	0.202913	0.933869	0.0297557	1
cg04551166		NR_130784	Body	LOC101927156	0.000690767	40.8462	0.432044	0.933767	0.063464	1
cg05211192	chr7:2116367-2116781	NM_003550;NM_001013837;NM_001013836	Body;Body;Body	MAD1L1;MAD1L1;MAD1L1	0.000698615	40.6732	0.240267	0.933513	0.0354435	1
cg12500091		NM_004327;NM_021574;NM_004327;NM_021574	ExonBnd;ExonBnd;Body;Body	BCR;BCR;BCR;BCR	0.000705411	40.5255	0.235217	0.933294	0.034825	1
cg25277809	chr2:128453174-128453446				0.000724567	40.1192	2.89745	0.932685	0.433327	1
cg01676322	chr17:43209347-43210746	NM_001135707;NM_001135706;NM_001135704;NM_001135705;NM_024722;NM_024722	5'UTR;5'UTR;5'UTR;5'UTR;1stExon;5'UTR	ACBD4;ACBD4;ACBD4;ACBD4;ACBD4;ACBD4	0.000736236	39.8786	0.144212	0.93232	0.0216977	1
cg11604128	chr12:110887861-110888245	NM_005719	TSS1500	ARPC3	0.000746837	39.6644	1.05894	-0.931991	0.160184	1
cg01680988		NM_178578;NM_006814	Body;Body	PSMF1;PSMF1	0.000750621	39.5889	3.75651	0.931874	0.569328	1
cg03761258	chr1:3731458-3732015	NM_014704	3'UTR	KIAA0562	0.000751545	39.5706	0.213108	0.931846	0.0323131	1
cg08933227	chr6:80656744-80657593	NM_022726	TSS1500	ELOVL4	0.000752608	39.5495	0.371039	0.931813	0.0562898	1
cg04497390	chr17:78327673-78327966	NM_020914;NR_029376	Body;Body	RNF213;LOC100294362	0.000758663	39.4302	0.164945	0.931627	0.0250992	1
cg10039051	chr12:123755246-123756408	NM_004642	TSS200	CDK2AP1	0.000762024	39.3645	0.0624304	-0.931525	0.00951573	1
cg22171996		NR_110323;NM_001029939;NM_001174158;NM_001289394;NM_001167583;NM_020863;NM_001174157	Body;Body;Body;Body;Body;Body;Body	ZFAT;ZFAT;ZFAT;ZFAT;ZFAT;ZFAT;ZFAT	0.000780552	39.0093	0.0705327	0.930964	0.0108486	1
cg15412135					0.000781611	38.9894	0.439596	0.930932	0.0676486	1
cg21433231	chr17:34819844-34820754				0.000797682	38.6908	1.02856	-0.930454	0.159504	1
cg13236093	chr3:57204169-57204417				0.000803808	38.579	0.37227	0.930273	0.0578973	1
cg05245319	chr16:67062613-67064012	NM_001755;NM_022845	TSS200;TSS200	CBFB;CBFB	0.000804017	38.5753	0.171044	0.930267	0.0266043	1
cg26891150	chr15:79576059-79576270	NM_001146341	5'UTR	ANKRD34C	0.000811781	38.4353	0.47099	0.930039	0.0735245	1
cg02741329		NM_002338	Body	LSAMP	0.000812595	38.4208	0.129795	-0.930015	0.0202696	1
cg06475362		NM_001256299;NM_001303016	5'UTR;5'UTR	MGC57346-CRHR1;MGC57346-CRHR1	0.00081484	38.3807	0.276277	0.92995	0.04319	1
cg07703397		NM_001168298;NM_001557	5'UTR;TSS200	CXCR2;CXCR2	0.000817564	38.3323	0.404086	0.92987	0.06325	1
cg15613012	chr6:28890951-28892013	NM_006510	Body	TRIM27	0.000818375	38.3179	0.348702	0.929847	0.0546014	1
cg22480773		NM_001010904	TSS1500	GLYATL3	0.000820219	38.2853	4.43053	0.929793	0.694345	1
cg25115537		NM_014943	5'UTR	ZHX2	0.000831079	38.0952	0.750257	-0.929479	0.118166	1
cg09277086	chr1:35258564-35258791				0.000837126	37.9907	0.25646	0.929305	0.0405036	1
cg06485706		NM_001014989;NM_001014987;NM_001014988;NM_014387	Body;TSS200;TSS200;TSS200	LAT;LAT;LAT;LAT	0.00083793	37.9769	0.128488	0.929282	0.0202999	1
cg21746711		NM_004656	3'UTR	BAP1	0.000843147	37.8878	0.189993	0.929133	0.0300878	1
cg05114984	chr4:17616175-17616506	NM_025205	Body	MED28	0.000844373	37.8669	0.093818	-0.929098	0.0148654	1
cg09646795	chr16:3190765-3191389	NM_001134655;NM_004220	Body;Body	ZNF213;ZNF213	0.000855224	37.6841	0.197362	0.92879	0.0314236	1
cg08401628					0.000858285	37.6331	1.62469	-0.928703	0.259031	1
cg07212827					0.000864798	37.5254	0.0709826	0.92852	0.0113495	1
cg26467762					0.000867522	37.4807	0.305128	0.928444	0.0488456	1
cg17112812	chr7:112031475-112032181				0.000867695	37.4778	0.325935	0.928439	0.0521805	1
cg05236941	chr2:241858187-241858535				0.000871256	37.4196	0.107893	-0.928339	0.0172999	1
cg07807709	chr1:149857769-149859470	NM_175065	TSS1500	HIST2H2AB	0.000871837	37.4102	0.16211	0.928323	0.0259999	1
cg11059159	chr2:128453174-128453446				0.000886581	37.1728	2.28589	0.927914	0.368961	1
cg25817261	chr19:6502090-6502411	NM_006087	Body	TUBB4	0.00089453	37.047	0.469688	-0.927695	0.0760689	1
cg14533651	chr12:13715849-13717034	NM_000834	Body	GRIN2B	0.000913891	36.7468	0.29286	0.927167	0.0478181	1
cg10102108					0.0009139	36.7467	0.353354	0.927167	0.0576957	1
cg10933497					0.000914316	36.7403	0.711005	0.927155	0.116113	1
cg26940755		NM_003757	Body	EIF3I	0.000920877	36.6405	0.224838	0.926978	0.036818	1
cg05023568	chr17:41363727-41364273	NM_001291572;NM_005899;NM_031862;NM_145041;NM_001291588;NM_001291586;NM_001291587	3'UTR;3'UTR;3'UTR;TSS1500;TSS1500;TSS1500;TSS1500	NBR1;NBR1;NBR1;TMEM106A;TMEM106A;TMEM106A;TMEM106A	0.000926722	36.5525	1.51525	-0.926821	0.248725	1
cg04346366	chr12:117257031-117257502	NM_032814;NM_001109903	Body;Body	RNFT2;RNFT2	0.000928789	36.5215	0.233297	-0.926766	0.0383276	1
cg13394060	chr9:140703858-140704066	NM_024757	Body	EHMT1	0.000932235	36.4701	0.273512	0.926674	0.0449978	1
cg02055483	chr11:66188130-66189397	NM_178864	TSS1500	NPAS4	0.000933707	36.4482	0.271557	0.926634	0.0447029	1
cg14763906	chr4:186392574-186393184	NM_152775;NM_001145411	Body;Body	CCDC110;CCDC110	0.000937543	36.3913	0.213304	0.926532	0.0351683	1
cg25264507		NR_040073	Body	MIR181A1HG	0.000939382	36.3642	0.722092	-0.926483	0.119143	1
cg21316981		NM_152493	5'UTR	ZNF362	0.000944044	36.2957	0.383431	0.926359	0.0633844	1
cg25802611		NM_001206999;NM_007174	Body;Body	CIT;CIT	0.000947397	36.2467	0.1486	-0.926271	0.0245981	1
cg00064341					0.000950551	36.2009	0.251784	0.926187	0.0417311	1
cg11317625					0.000956009	36.122	0.349863	0.926044	0.0581136	1
cg24157392		NM_181780;NM_001085357	Body;Body	BTLA;BTLA	0.000957255	36.1041	0.87058	-0.926011	0.144678	1
cg19742172		NM_198693;NR_130165;NM_001272037;NM_144991	TSS200;TSS200;Body;Body	KRTAP10-2;KRTAP10-2;TSPEAR;TSPEAR	0.00096179	36.0391	0.346142	0.925892	0.0576278	1
cg23850637	chr12:132938326-132939235				0.000972939	35.8811	0.321373	-0.925601	0.0537397	1
cg08634539	chr14:60631740-60632254	NM_016029	1stExon	DHRS7	0.000977792	35.8131	0.105024	-0.925475	0.0175953	1
cg02766704		NM_033427	Body	CTTNBP2	0.000987766	35.6747	0.578966	0.925218	0.0973741	1
cg14818866	chr19:19231786-19232021	NM_017814	Body	TMEM161A	0.000988225	35.6684	0.0466373	0.925206	0.00784514	1
cg16750157	chr4:174459200-174460054	NR_003679	Body	NBLA00301	0.000991807	35.6192	0.189387	-0.925114	0.0319021	1
cg26719995	chr2:27308546-27309770	NM_000221;NM_007046;NM_006488	TSS1500;3'UTR;TSS1500	KHK;EMILIN1;KHK	0.000992461	35.6102	0.0904115	-0.925097	0.0152335	1
cg14653394	chr6:3157400-3158418	NM_001069;NM_001310315	TSS1500;TSS1500	TUBB2A;TUBB2A	0.000996447	35.5558	0.151803	-0.924995	0.0256166	1
